# Supplementary material for: Effect of Plasminogen Activator Inhibitor-1 and Tissue Plasminogen Activator Polymorphisms on Susceptibility to Type 2 Diabetes in Malaysian Subjects
Source: Hindawi journal article supplement (doi:10.1155/2012/234937), 2012-01-01
Supplement: f1 [file 234937.f1.doc]

Table 1s Association of PAI-1 4G/5G polymorphisms with type 2 diabetes mellitus in Malaysian subjects

| **PAI-1 4G/5G polymorphism** | **Control (n=130)** | **Type 2 diabetes mellitus** | | **Total Type 2 diabetes mellitus (n=303)** |
| --- | --- | --- | --- | --- |
| **without MetS (n=76)** | **with MetS** (**n=227)** |
| Risk Allele frequency (4G) | 0.47 | 0.48 | 0.49 | 0.50 |
| (4G/4G)/ (4G/5G)/ (5G/5G) (frequency) | 0.23/0.485/0.29 | 0.25/0.54/0.21 | 0.25/0.48/0.27 | 0.25/0.50/0.25 |
| Recessive Model | Odds ratio | 1.83 | 1.3 | 1.55 |
| (95% CI) | (0 .78-4.27) | (0 .75-2.3) | (0.82-2.90) |
| P-Value | 0.16 | 0.34 | 0.18 |
| Dominant Model | Odds ratio | 2.41 | 1.27 | 1.66 |
| (95% CI) | (1 .05-5.52) | (0 .73-2.22) | (0.92-3.0) |
| P-Value | ***0.037*** | 0.40 | **0.09** |
| Additive Model | Odds ratio | 1.69 | 1.26 | 1.45 |
| (95% CI) | (1.0-2.87) | (0 .88-1.78) | (1.0-2.11) |
| P-Value | **0.05** | 0.21 | **0.052** |

In the additive model, genotype of homozygote for the non-risk allele 5G/5G (0/0), heterozygote 4G/5G (1/0) and homozygote for the risk allele 4G/4G (1/1) were coded as 0, 1 and 2 respectively. The recessive model was defined as 4G/4G vs. (4G/5G+5G/5G), dominant model as (4G/4G+4G/5G) vs. 5G/5G and additive model as 4G/4G vs. 4G/5G vs. 5G/5G. The results presented odds ratio, 95% CI and P-value which adjusted for age, gender, race and family history of diabetes as covariates which evaluated by hierarchical logistic regression. MetS: metabolic syndrome

Table 2s Association of tPA Alu repeat-I/D polymorphism with type 2 diabetes mellitus in Malaysian subjects

| **tPA Alu repeat I/D polymorphism** | **Control (n=130)** | **Type 2 diabetes mellitus** | | **Total Type 2 diabetes mellitus (n=303)** |
| --- | --- | --- | --- | --- |
| **without MetS (n=76)** | **with MetS** (**n=227)** |
| Risk Allele frequency (Insertion) | 0.48 | 0.47 | 0.50 | 0.49 |
| II/ID/DD (frequency) | 0.23/0.49/0.28 | 0.28/0.50/0.22 | 0.26/0.48/0.26 | 0.25/0.49/0.26 |
| Recessive Model | Odds ratio | 1.91 | 1.22 | 1.26 |
| 95% CI | 0 .82-4.44 | 0 .66-2.27 | 0.67-2.36 |
| P-Value | 0.13 | 0.53 | 0.48 |
| Dominant Model | Odds ratio | 0.98 | 0.96 | 0.91 |
| 95% CI | 0 .42-2.31 | 0 .55-1.69 | 0.51-1.62 |
| P-Value | 0.97 | 0.90 | 0.74 |
| Additive Model | Odds ratio | 1.3 | 1.04 | 1.03 |
| 95% CI | 0 .77-2.17 | 0 .73-1.48 | 0.71-1.48 |
| P-Value | 0.32 | 0.83 | 0.89 |

In the additive model, genotype of homozygote for the non-risk allele D/D (0/0), heterozygote I/D (1/0) and homozygote for the risk allele I/I (1/1) were coded as 0, 1 and 2 respectively. The recessive model was defined as I/I vs. (I/D + D/D), dominant model as (I/I + I/D) vs. D/D and additive model as D/D vs. I/D vs. I/I. The results presented odds ratio, 95% CI and P-value which adjusted for age, gender, race and family history of diabetes as covariates which evaluated by hierarchical logistic regression. MetS: metabolic syndrome.

Table 3s Association of PAI-1 4G/5G and tPA Alu repeat I/D polymorphisms with the age of onset of diabetes among Malaysian

subjects with type 2 diabetes mellitus.

| **Parameters** | **PAI-1 Polymorphism** | | | | | | |
| --- | --- | --- | --- | --- | --- | --- | --- |
| **4G/4G n(71)** | **4G/5G n(145)** | **5G/5G n(73)** | **Univariate P-value** | **4G/4G versus 5G/5G P-value** | **4G/5G versus 5G/5G P-value** | **4G/5G versus 4G/4G P-value** |
| **Age of onset of diabetes (years)** | 44.32 (42.28-46.37) | 42.94 (41.52-44.35) | 44.06 (42.01-46.11) | 0.47 | 0.86 | 0.38 | 0.28 |
|  | **tPA Polymorphism** | | | | | | |
|  | **D/D n(73)** | **I/D n(140)** | **I/I n(76)** | **Univariate P-value** | **D/D versus I/I P-value** | **I/D versus I/I P-value** | **I/D versus D/D P-value** |
| **Age of onset of diabetes (years)** | 43.01 (40.85-45.17) | 42.79 (41.24-44.34) | 42.89 (40.78-45.0) | 0.99 | 0.94 | 0.87 | 0.94 |

The results presented represent means and 95% confidence interval of the mean adjusted for gender, race and history of diabetes as covariates which evaluated by univariate (General Linear Model).
